# Supplementary material for: TOPAZ1, a Novel Germ Cell-Specific Expressed Gene Conserved during Evolution across Vertebrates
Source: PubMed Central journal article supplement (PMC3206057; doi:10.1371/journal.pone.0026950), 2011-11-01

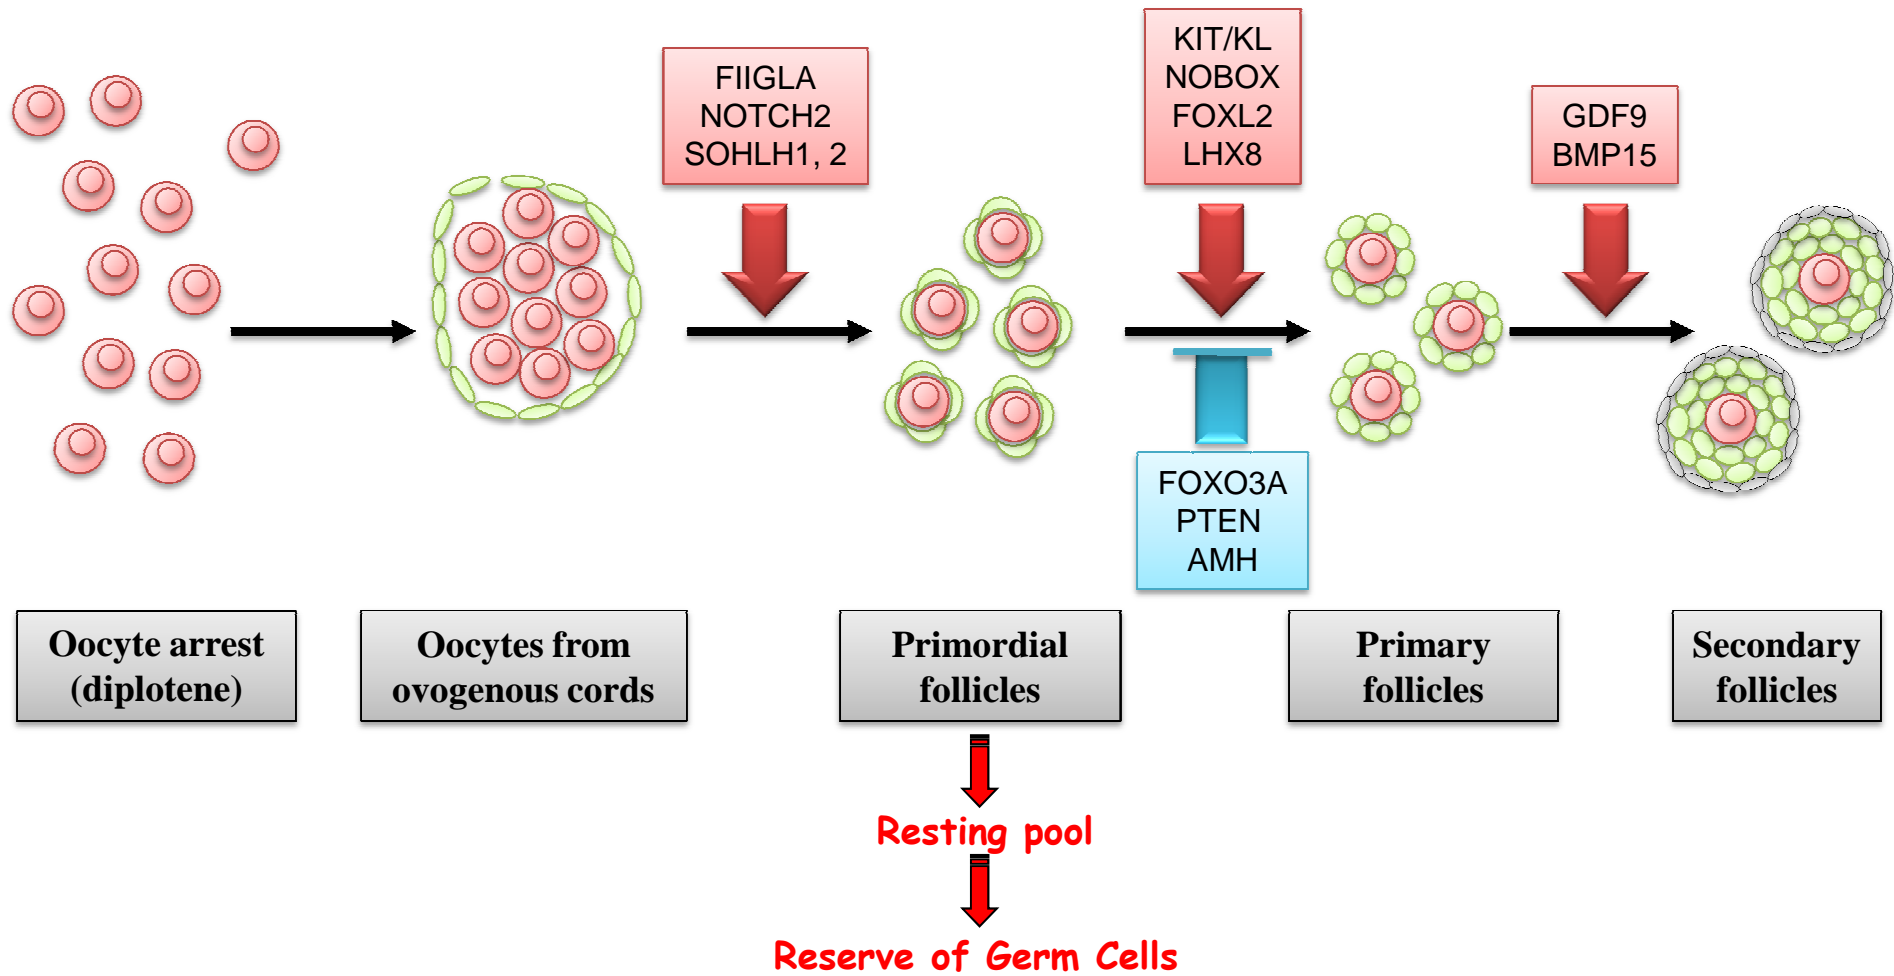

Supplement: pone.0026950.s001.pdf [file pone.0026950.s001.pdf]
