# Supplementary material for: TOPAZ1, a Novel Germ Cell-Specific Expressed Gene Conserved during Evolution across Vertebrates
Source: PubMed Central journal article supplement (PMC3206057; doi:10.1371/journal.pone.0026950), 2011-11-01
Supplement: pone.0026950.s003.pdf [file pone.0026950.s003.pdf]

**Table S1 - 5' RACE primer sequences used in sheep**

| <b>Type of Primers</b>          | <b>Primers</b>              |
|---------------------------------|-----------------------------|
| <i>TOPAZI_RT</i>                | 5' -AGTCATTTTGAGAGCTGGGC-3' |
| <i>TOPAZI</i> specific primer 1 | 5' -CTACCAACCTTTCCTTACCC-3' |
| <i>TOPAZI-2</i>                 | 5' -TCACTGCATTCCACTGTTGG-3' |
| <i>TOPAZI-3</i>                 | 5' -CTGTGGATCATCACTTGAGG-3' |
