# Supplementary material for: TOPAZ1, a Novel Germ Cell-Specific Expressed Gene Conserved during Evolution across Vertebrates
Source: PubMed Central journal article supplement (PMC3206057; doi:10.1371/journal.pone.0026950), 2011-11-01
Supplement: pone.0026950.s004.pdf [file pone.0026950.s004.pdf]

**Table S2 - Sequences of semi-quantitative RT-PCR primers used to sequence full-length *TOPAZ1* cDNA in sheep (ov, ovin)**

| Gene                        | Primers                                                    | Annealing temperature (°C) | Elongation time (sec) | Cycles | MgCl <sup>2</sup> (mM) | Size (bp) |
|-----------------------------|------------------------------------------------------------|----------------------------|-----------------------|--------|------------------------|-----------|
| ov <i>TOPAZ1</i> exon 1     | 5' -CCACGCGTCGACTAGTACGG-3'<br>5' -TTACCAGGTCAATCCCTGGC-3' | 55                         | 30                    | 35     | 2,5                    | 421       |
| ov <i>TOPAZ1</i> exon 2A    | 5' -GAAGCCTCAAGTGATGATCC-3'<br>5' -GGTACATGCATACATCCTCC-3' | 55                         | 30                    | 35     | 2,5                    | 398       |
| ov <i>TOPAZ1</i> exon 2B    | 5' -GGCTAC ACAAACAGTAAGG-3'<br>5' -GTTCTTTTGCCAGTCATTGG-3' | 55                         | 30                    | 35     | 2,5                    | 912       |
| ov <i>TOPAZ1</i> exon 2C    | 5' -TGAAAAGAGGTCTTCTAGGG-3'<br>5' -TCTCTCTCTGATGACTTGGC-3' | 55                         | 30                    | 35     | 2,5                    | 744       |
| ov <i>TOPAZ1</i> exon 2D    | 5' -AGATACTGAACACAGGACGG-3'<br>5' -TGCTCTTCAGCAACATTGGG-3' | 55                         | 30                    | 35     | 2,5                    | 672       |
| ov <i>TOPAZ1</i> exon 2-8   | 5' -CAGACCTCTTTGGAGTCTCC-3'<br>5' -AGTGGCTTCTGGAACACCCC-3' | 59                         | 30                    | 35     | 2,5                    | 652       |
| ov <i>TOPAZ1</i> exon 8-15  | 5' -ACAGTGCAAGTTTGGTCACG-3'<br>5' -TCATTCCGATTCTTCCCAGC-3' | 56                         | 30                    | 35     | 2,5                    | 776       |
| ov <i>TOPAZ1</i> exon 14-18 | 5' -GACTGTAAAGAAGAGCGACC-3'<br>5' -GCTCTGGCTTTGAGCCATAA-3' | 56                         | 30                    | 35     | 2,5                    | 677       |
| ov <i>TOPAZ1</i> exon 18-20 | 5' -ACAGCCTTGGTATGTCATCC-3'<br>5' -ATCTTTCCACTGCAGCTTGG-3' | 56                         | 30                    | 35     | 2,5                    | 378       |
| ov <i>TOPAZ1</i> exon 19-20 | 5' -GCTAGTAGTATTCAGAGTCC-3'<br>5' -AAAAGCCAAACCTTTCCGGC-3' | 53                         | 30                    | 35     | 2,5                    | 267       |
