# Supplementary material for: TOPAZ1, a Novel Germ Cell-Specific Expressed Gene Conserved during Evolution across Vertebrates
Source: PubMed Central journal article supplement (PMC3206057; doi:10.1371/journal.pone.0026950), 2011-11-01
Supplement: pone.0026950.s005.pdf [file pone.0026950.s005.pdf]

**Table S3 - Sequences of semi-quantitative RT-PCR primers used to sequence and/or verify the size of mouse *Topaz1* cDNA (mu, mouse)**

| <b>Gene</b>                 | <b>Primers</b>                                             | <b>size</b> |
|-----------------------------|------------------------------------------------------------|-------------|
| mu <i>Topaz1</i> Exon 1     | 5' -GCACCACCCGAGGCCTGAGG-3'<br>5' -ACCTTCTGTCTCTTCTCTCC-3' | 155bp       |
| mu <i>Topaz1</i> Exon 2 A   | 5' -GAGGCCCAAGTGATGATCC-3'<br>5' -GCAAGATTCCTAAGGTTTTC-3'  | 467bp       |
| mu <i>Topaz1</i> Exon 2 B   | 5' -GACATCAATAACCAGTTCGG-3'<br>5' -TTCTCCAGTGTTGTTCTCC-3'  | 593bp       |
| mu <i>Topaz1</i> Exon 2 C   | 5' -AATAGCCAGTAAGTACTGC-3'<br>5' -TTTTAACCAAGTCCGGTGCC-3'  | 1269bp      |
| mu <i>Topaz1</i> Exon 2-4   | 5' -TAATGCAACTGAAGACACCC-3'<br>5' -TTCAGTGAAGCCTTCTAGGC-3' | 1087bp      |
| mu <i>Topaz1</i> Exon 4-14  | 5' -ATGATCCTGAAGGAGCAGCC-3'<br>5' -AGCGTCTCAGCAACACAAGC-3' | 1129bp      |
| mu <i>Topaz1</i> Exon 14-20 | 5' -CTGGACCAAATTGGGAAACC-3'<br>5' -ATATTCGAGCAGCCATGACC-3' | 1050bp      |
| mu <i>Topaz1</i> Exon 20    | 5' -ACAGGTGCTGCAGATTGTCC-3'<br>5' -CCCTTTACTAATGGTTAGTG-3' | 255bp       |
