# Supplementary material for: TOPAZ1, a Novel Germ Cell-Specific Expressed Gene Conserved during Evolution across Vertebrates
Source: PubMed Central journal article supplement (PMC3206057; doi:10.1371/journal.pone.0026950), 2011-11-01
Supplement: pone.0026950.s007.pdf [file pone.0026950.s007.pdf]

**Table S5 - Sequences of qPCR primers (mu, mouse; ov, ovin)**

| <b>Gene</b>     | <b>Primers</b>                                                         |
|-----------------|------------------------------------------------------------------------|
| <b>ovTOPAZ1</b> | 5' - TTCATTAAGCACATGACCGTCAA - 3'<br>5' - CCGGCCCACTTCATATTCTCT - 3'   |
| <b>ovDMC1</b>   | 5' TCATACCCTCTGTGTGACAGCTC - 3'<br>5' -GGCGATCTGGACGGAAAGTA - 3'       |
| <b>ovHPRT1</b>  | 5' -TGGACTAATTATGGACAGGACCG - 3'<br>5' -TATAGCCCCCCTTGAGCACA - 3'      |
| <b>muTopaz1</b> | 5' -ACATTGCGTGGCTGTGAGC - 3'<br>5' -CTCAGGCACATGGACAAACTTG - 3'        |
| <b>mu-Mvh</b>   | 5' -GAAGAAATCCAGAGGTTGGC - 3'<br>5' -GAAGGATCGTCTGCTGAACA - 3'         |
| <b>mu-Actb</b>  | 5' -GCCCTGAGGCTCTTTTCCAG - 3'<br>5' -TGCCACAGGATTCCATACCC - 3'         |
| <b>mu-Rec8</b>  | 5' -CCAAGGCCTGAACTCTCTTC - 3'<br>5' -ATAGAAGACCCGAGAAGCCA - 3'         |
| <b>muWt1</b>    | 5' -GGCAGGAAAGTG TGCAAAGTCT - 3'<br>5' -TGTGCTGTCTTG GAAGTCGGATGT - 3' |
| <b>muHprt1</b>  | 5' -CAAAGCCTAAGATGAGCGCAA - 3'<br>5' -AGGCAGATGGCCACAGGAC - 3'         |
